# Supplementary material for: Fourier-transform microwave spectroscopy of the ClSS radical
Source: Royal Society of Chemistry journal article supplement (doi:10.1039/d4cp03122a), 2024-01-01
Supplement: d4cp03122a1.pdf [file d4cp03122a1.pdf]

Supplemental Material  
Fourier-transform microwave spectroscopy of  
the CISS radical

C. H. Chang, C. H. Tsai, and Yasuki Endo

**Table S1.** Observed transition frequencies of the  $^{35}\text{ClSS}$  radical. (in MHz)

| $N$ | $K_a$ | $K_c$ | $J$ | $F$ | $N'$ | $K_a'$ | $K_c'$ | $J'$ | $F'$ | Observed  | Calculated | O.-C.  |
|-----|-------|-------|-----|-----|------|--------|--------|------|------|-----------|------------|--------|
| 1   | 1     | 1     | 0.5 | 1.0 | 0    | 0      | 0      | 0.5  | 1.0  | 21438.398 | 21438.399  | -0.001 |
| 1   | 1     | 1     | 0.5 | 1.0 | 0    | 0      | 0      | 0.5  | 2.0  | 21435.174 | 21435.175  | -0.001 |
| 1   | 1     | 1     | 0.5 | 2.0 | 0    | 0      | 0      | 0.5  | 1.0  | 21428.653 | 21428.648  | 0.005  |
| 1   | 1     | 1     | 0.5 | 2.0 | 0    | 0      | 0      | 0.5  | 2.0  | 21425.423 | 21425.423  | 0.000  |
| 1   | 1     | 1     | 1.5 | 3.0 | 0    | 0      | 0      | 0.5  | 2.0  | 20405.390 | 20405.393  | -0.003 |
| 1   | 1     | 0     | 0.5 | 1.0 | 1    | 0      | 1      | 0.5  | 2.0  | 16531.969 | 16531.956  | 0.013  |
| 1   | 1     | 0     | 0.5 | 2.0 | 1    | 0      | 1      | 0.5  | 2.0  | 16553.778 | 16553.776  | 0.002  |
| 1   | 1     | 0     | 1.5 | 0.0 | 1    | 0      | 1      | 1.5  | 1.0  | 15509.815 | 15509.819  | -0.004 |
| 1   | 1     | 0     | 1.5 | 1.0 | 1    | 0      | 1      | 1.5  | 2.0  | 15521.855 | 15521.858  | -0.003 |
| 1   | 1     | 0     | 1.5 | 2.0 | 1    | 0      | 1      | 1.5  | 2.0  | 15527.787 | 15527.789  | -0.002 |
| 1   | 1     | 0     | 1.5 | 3.0 | 1    | 0      | 1      | 1.5  | 2.0  | 15518.600 | 15518.604  | -0.004 |
| 1   | 1     | 0     | 1.5 | 3.0 | 1    | 0      | 1      | 1.5  | 3.0  | 15506.280 | 15506.281  | -0.001 |
| 2   | 1     | 1     | 1.5 | 0.0 | 2    | 0      | 2      | 1.5  | 1.0  | 16643.816 | 16643.809  | 0.007  |
| 2   | 1     | 1     | 1.5 | 1.0 | 2    | 0      | 2      | 1.5  | 2.0  | 16656.382 | 16656.394  | -0.012 |
| 2   | 1     | 1     | 1.5 | 2.0 | 2    | 0      | 2      | 1.5  | 1.0  | 16643.149 | 16643.168  | -0.019 |
| 2   | 1     | 1     | 1.5 | 2.0 | 2    | 0      | 2      | 1.5  | 2.0  | 16656.546 | 16656.562  | -0.016 |
| 2   | 1     | 1     | 1.5 | 2.0 | 2    | 0      | 2      | 1.5  | 3.0  | 16655.647 | 16655.664  | -0.017 |
| 2   | 1     | 1     | 1.5 | 3.0 | 2    | 0      | 2      | 1.5  | 2.0  | 16662.678 | 16662.663  | 0.015  |
| 2   | 1     | 1     | 1.5 | 3.0 | 2    | 0      | 2      | 1.5  | 3.0  | 16661.780 | 16661.765  | 0.015  |
| 2   | 1     | 1     | 2.5 | 1.0 | 2    | 0      | 2      | 2.5  | 1.0  | 16010.750 | 16010.729  | 0.021  |
| 2   | 1     | 1     | 2.5 | 2.0 | 2    | 0      | 2      | 2.5  | 2.0  | 16009.884 | 16009.877  | 0.007  |
| 2   | 1     | 1     | 2.5 | 3.0 | 2    | 0      | 2      | 2.5  | 2.0  | 16006.111 | 16006.109  | 0.002  |
| 2   | 1     | 1     | 2.5 | 3.0 | 2    | 0      | 2      | 2.5  | 3.0  | 16008.749 | 16008.751  | -0.002 |
| 2   | 1     | 1     | 2.5 | 4.0 | 2    | 0      | 2      | 2.5  | 4.0  | 16003.258 | 16003.261  | -0.003 |
| 3   | 1     | 2     | 2.5 | 2.0 | 3    | 0      | 3      | 2.5  | 2.0  | 17159.084 | 17159.094  | -0.010 |
| 3   | 1     | 2     | 2.5 | 3.0 | 3    | 0      | 3      | 2.5  | 3.0  | 17165.242 | 17165.220  | 0.022  |
| 3   | 1     | 2     | 2.5 | 4.0 | 3    | 0      | 3      | 2.5  | 4.0  | 17173.613 | 17173.617  | -0.004 |
| 3   | 1     | 2     | 3.5 | 2.0 | 3    | 0      | 3      | 3.5  | 2.0  | 16635.184 | 16635.197  | -0.013 |
| 3   | 1     | 2     | 3.5 | 3.0 | 3    | 0      | 3      | 3.5  | 3.0  | 16638.525 | 16638.525  | 0.000  |
| 3   | 1     | 2     | 3.5 | 3.0 | 3    | 0      | 3      | 3.5  | 4.0  | 16639.829 | 16639.833  | -0.004 |
| 3   | 1     | 2     | 3.5 | 4.0 | 3    | 0      | 3      | 3.5  | 4.0  | 16638.432 | 16638.434  | -0.002 |
| 3   | 1     | 2     | 3.5 | 5.0 | 3    | 0      | 3      | 3.5  | 5.0  | 16628.542 | 16628.542  | 0.000  |
| 4   | 1     | 3     | 3.5 | 3.0 | 4    | 0      | 4      | 3.5  | 3.0  | 17933.668 | 17933.658  | 0.010  |
| 4   | 1     | 3     | 3.5 | 4.0 | 4    | 0      | 4      | 3.5  | 4.0  | 17940.470 | 17940.470  | 0.000  |
| 4   | 1     | 3     | 3.5 | 5.0 | 4    | 0      | 4      | 3.5  | 5.0  | 17941.676 | 17941.682  | -0.006 |
| 4   | 1     | 3     | 4.5 | 3.0 | 4    | 0      | 4      | 4.5  | 3.0  | 17471.067 | 17471.068  | -0.001 |
| 4   | 1     | 3     | 4.5 | 4.0 | 4    | 0      | 4      | 4.5  | 4.0  | 17473.845 | 17473.844  | 0.001  |
| 4   | 1     | 3     | 4.5 | 5.0 | 4    | 0      | 4      | 4.5  | 5.0  | 17472.617 | 17472.614  | 0.003  |
| 4   | 1     | 3     | 4.5 | 6.0 | 4    | 0      | 4      | 4.5  | 6.0  | 17464.112 | 17464.111  | 0.001  |
| 5   | 0     | 5     | 5.5 | 6.0 | 4    | 1      | 4      | 4.5  | 5.0  | 12428.669 | 12428.669  | 0.000  |

| $N$ | $K_a$ | $K_c$ | $J$ | $F$ | $N'$ | $K_a'$ | $K_c'$ | $J'$ | $F'$ | Observed  | Calculated | O.-C.  |
|-----|-------|-------|-----|-----|------|--------|--------|------|------|-----------|------------|--------|
| 5   | 0     | 5     | 5.5 | 7.0 | 4    | 1      | 4      | 4.5  | 6.0  | 12425.692 | 12425.693  | -0.001 |
| 5   | 1     | 4     | 4.5 | 5.0 | 5    | 0      | 5      | 4.5  | 5.0  | 18987.273 | 18987.277  | -0.004 |
| 5   | 1     | 4     | 4.5 | 6.0 | 5    | 0      | 5      | 4.5  | 6.0  | 18988.145 | 18988.150  | -0.005 |
| 5   | 1     | 4     | 5.5 | 4.0 | 5    | 0      | 5      | 5.5  | 4.0  | 18536.828 | 18536.828  | 0.000  |
| 5   | 1     | 4     | 5.5 | 5.0 | 5    | 0      | 5      | 5.5  | 5.0  | 18539.087 | 18539.086  | 0.001  |
| 5   | 1     | 4     | 5.5 | 6.0 | 5    | 0      | 5      | 5.5  | 6.0  | 18537.374 | 18537.369  | 0.005  |
| 5   | 1     | 4     | 5.5 | 7.0 | 5    | 0      | 5      | 5.5  | 7.0  | 18529.192 | 18529.188  | 0.004  |
| 2   | 0     | 2     | 1.5 | 1.0 | 1    | 0      | 1      | 0.5  | 1.0  | 10567.665 | 10567.655  | 0.010  |
| 2   | 0     | 2     | 1.5 | 2.0 | 1    | 0      | 1      | 0.5  | 1.0  | 10554.266 | 10554.261  | 0.005  |
| 2   | 0     | 2     | 1.5 | 2.0 | 1    | 0      | 1      | 0.5  | 2.0  | 10569.906 | 10569.907  | -0.001 |
| 2   | 0     | 2     | 1.5 | 3.0 | 1    | 0      | 1      | 0.5  | 2.0  | 10570.806 | 10570.806  | 0.000  |
| 2   | 0     | 2     | 2.5 | 2.0 | 1    | 0      | 1      | 1.5  | 2.0  | 10513.828 | 10513.826  | 0.002  |
| 2   | 0     | 2     | 2.5 | 3.0 | 1    | 0      | 1      | 1.5  | 2.0  | 10511.182 | 10511.184  | -0.002 |
| 2   | 0     | 2     | 2.5 | 3.0 | 1    | 0      | 1      | 1.5  | 3.0  | 10498.862 | 10498.860  | 0.002  |
| 2   | 0     | 2     | 2.5 | 4.0 | 1    | 0      | 1      | 1.5  | 3.0  | 10512.305 | 10512.306  | -0.001 |
| 2   | 1     | 1     | 1.5 | 3.0 | 1    | 1      | 0      | 0.5  | 2.0  | 10678.809 | 10678.794  | 0.015  |
| 2   | 1     | 1     | 2.5 | 2.0 | 1    | 1      | 0      | 1.5  | 1.0  | 11001.858 | 11001.846  | 0.012  |
| 2   | 1     | 1     | 2.5 | 3.0 | 1    | 1      | 0      | 1.5  | 2.0  | 10992.147 | 10992.146  | 0.001  |
| 2   | 1     | 1     | 2.5 | 4.0 | 1    | 1      | 0      | 1.5  | 3.0  | 11009.284 | 11009.286  | -0.002 |
| 2   | 1     | 2     | 1.5 | 3.0 | 1    | 1      | 1      | 0.5  | 2.0  | 9885.376  | 9885.378   | -0.002 |
| 2   | 1     | 2     | 2.5 | 3.0 | 1    | 1      | 1      | 1.5  | 2.0  | 10254.881 | 10254.879  | 0.002  |
| 2   | 1     | 2     | 2.5 | 4.0 | 1    | 1      | 1      | 1.5  | 3.0  | 10267.380 | 10267.380  | 0.000  |
| 3   | 0     | 3     | 2.5 | 2.0 | 2    | 0      | 2      | 1.5  | 1.0  | 15807.607 | 15807.588  | 0.019  |
| 3   | 0     | 3     | 2.5 | 3.0 | 2    | 0      | 2      | 1.5  | 2.0  | 15813.364 | 15813.373  | -0.009 |
| 3   | 0     | 3     | 2.5 | 4.0 | 2    | 0      | 2      | 1.5  | 3.0  | 15809.833 | 15809.834  | -0.001 |
| 3   | 0     | 3     | 3.5 | 2.0 | 2    | 0      | 2      | 2.5  | 1.0  | 15762.832 | 15762.837  | -0.005 |
| 3   | 0     | 3     | 3.5 | 3.0 | 2    | 0      | 2      | 2.5  | 2.0  | 15763.092 | 15763.094  | -0.002 |
| 3   | 0     | 3     | 3.5 | 4.0 | 2    | 0      | 2      | 2.5  | 3.0  | 15764.432 | 15764.429  | 0.003  |
| 3   | 0     | 3     | 3.5 | 5.0 | 2    | 0      | 2      | 2.5  | 4.0  | 15765.313 | 15765.313  | 0.000  |
| 3   | 1     | 3     | 2.5 | 3.0 | 2    | 1      | 2      | 1.5  | 2.0  | 15143.188 | 15143.189  | -0.001 |
| 3   | 1     | 3     | 3.5 | 2.0 | 2    | 1      | 2      | 2.5  | 1.0  | 15286.755 | 15286.747  | 0.008  |
| 3   | 1     | 3     | 3.5 | 3.0 | 2    | 1      | 2      | 2.5  | 2.0  | 15284.738 | 15284.739  | -0.001 |
| 3   | 1     | 3     | 3.5 | 4.0 | 2    | 1      | 2      | 2.5  | 3.0  | 15285.655 | 15285.656  | -0.001 |
| 3   | 1     | 3     | 3.5 | 5.0 | 2    | 1      | 2      | 2.5  | 4.0  | 15289.529 | 15289.530  | -0.001 |
| 3   | 1     | 3     | 2.5 | 4.0 | 2    | 0      | 2      | 1.5  | 3.0  | 30560.598 | 30560.603  | -0.005 |
| 3   | 1     | 3     | 3.5 | 2.0 | 2    | 0      | 2      | 2.5  | 1.0  | 30196.867 | 30196.861  | 0.006  |
| 3   | 1     | 3     | 3.5 | 3.0 | 2    | 0      | 2      | 2.5  | 2.0  | 30197.338 | 30197.335  | 0.003  |
| 3   | 1     | 3     | 3.5 | 4.0 | 2    | 0      | 2      | 2.5  | 3.0  | 30200.176 | 30200.176  | 0.000  |
| 3   | 1     | 3     | 3.5 | 5.0 | 2    | 0      | 2      | 2.5  | 4.0  | 30202.788 | 30202.789  | -0.001 |
| 3   | 1     | 2     | 2.5 | 3.0 | 2    | 1      | 1      | 1.5  | 2.0  | 16322.060 | 16322.032  | 0.028  |
| 3   | 1     | 2     | 2.5 | 4.0 | 2    | 1      | 1      | 1.5  | 3.0  | 16321.667 | 16321.686  | -0.019 |
| 3   | 1     | 2     | 3.5 | 3.0 | 2    | 1      | 1      | 2.5  | 2.0  | 16391.734 | 16391.742  | -0.008 |

| $N$ | $K_a$ | $K_c$ | $J$ | $F$ | $N'$ | $K_a'$ | $K_c'$ | $J'$ | $F'$ | Observed  | Calculated | O.-C.  |
|-----|-------|-------|-----|-----|------|--------|--------|------|------|-----------|------------|--------|
| 3   | 1     | 2     | 3.5 | 4.0 | 2    | 1      | 1      | 2.5  | 3.0  | 16394.114 | 16394.111  | 0.003  |
| 3   | 1     | 2     | 3.5 | 5.0 | 2    | 1      | 1      | 2.5  | 4.0  | 16390.597 | 16390.594  | 0.003  |
| 4   | 0     | 4     | 3.5 | 2.0 | 3    | 0      | 3      | 2.5  | 1.0  | 21063.560 | 21063.569  | -0.009 |
| 4   | 0     | 4     | 3.5 | 3.0 | 3    | 0      | 3      | 2.5  | 2.0  | 21055.221 | 21055.246  | -0.025 |
| 4   | 0     | 4     | 3.5 | 4.0 | 3    | 0      | 3      | 2.5  | 3.0  | 21054.253 | 21054.238  | 0.015  |
| 4   | 0     | 4     | 3.5 | 5.0 | 3    | 0      | 3      | 2.5  | 4.0  | 21061.594 | 21061.591  | 0.003  |
| 4   | 0     | 4     | 4.5 | 3.0 | 3    | 0      | 3      | 3.5  | 2.0  | 20997.434 | 20997.432  | 0.002  |
| 4   | 0     | 4     | 4.5 | 4.0 | 3    | 0      | 3      | 3.5  | 3.0  | 20996.985 | 20996.985  | 0.000  |
| 4   | 0     | 4     | 4.5 | 5.0 | 3    | 0      | 3      | 3.5  | 4.0  | 20998.288 | 20998.296  | -0.008 |
| 4   | 0     | 4     | 4.5 | 6.0 | 3    | 0      | 3      | 3.5  | 5.0  | 20998.319 | 20998.318  | 0.001  |
| 4   | 1     | 4     | 3.5 | 2.0 | 3    | 1      | 3      | 2.5  | 1.0  | 20272.448 | 20272.448  | 0.000  |
| 4   | 1     | 4     | 3.5 | 3.0 | 3    | 1      | 3      | 2.5  | 2.0  | 20270.520 | 20270.521  | -0.001 |
| 4   | 1     | 4     | 3.5 | 4.0 | 3    | 1      | 3      | 2.5  | 3.0  | 20271.736 | 20271.738  | -0.002 |
| 4   | 1     | 4     | 3.5 | 5.0 | 3    | 1      | 3      | 2.5  | 4.0  | 20273.788 | 20273.789  | -0.001 |
| 4   | 1     | 4     | 4.5 | 3.0 | 3    | 1      | 3      | 3.5  | 2.0  | 20337.509 | 20337.510  | -0.001 |
| 4   | 1     | 4     | 4.5 | 4.0 | 3    | 1      | 3      | 3.5  | 3.0  | 20336.831 | 20336.829  | 0.002  |
| 4   | 1     | 4     | 4.5 | 5.0 | 3    | 1      | 3      | 3.5  | 4.0  | 20337.847 | 20337.849  | -0.002 |
| 4   | 1     | 4     | 4.5 | 6.0 | 3    | 1      | 3      | 3.5  | 5.0  | 20339.554 | 20339.556  | -0.002 |
| 4   | 1     | 3     | 3.5 | 3.0 | 3    | 1      | 2      | 2.5  | 2.0  | 21829.807 | 21829.809  | -0.002 |
| 4   | 1     | 3     | 3.5 | 4.0 | 3    | 1      | 2      | 2.5  | 3.0  | 21829.483 | 21829.488  | -0.005 |
| 4   | 1     | 3     | 3.5 | 5.0 | 3    | 1      | 2      | 2.5  | 4.0  | 21829.657 | 21829.656  | 0.001  |
| 4   | 1     | 3     | 4.5 | 3.0 | 3    | 1      | 2      | 3.5  | 2.0  | 21833.305 | 21833.304  | 0.001  |
| 4   | 1     | 3     | 4.5 | 4.0 | 3    | 1      | 2      | 3.5  | 3.0  | 21832.304 | 21832.303  | 0.001  |
| 4   | 1     | 3     | 4.5 | 5.0 | 3    | 1      | 2      | 3.5  | 4.0  | 21832.477 | 21832.477  | 0.000  |
| 4   | 1     | 3     | 4.5 | 6.0 | 3    | 1      | 2      | 3.5  | 5.0  | 21833.887 | 21833.886  | 0.001  |
| 4   | 1     | 4     | 3.5 | 4.0 | 3    | 0      | 3      | 2.5  | 3.0  | 35019.467 | 35019.482  | -0.015 |
| 4   | 1     | 4     | 3.5 | 5.0 | 3    | 0      | 3      | 2.5  | 4.0  | 35024.565 | 35024.559  | 0.006  |
| 4   | 1     | 4     | 4.5 | 3.0 | 3    | 0      | 3      | 3.5  | 2.0  | 34771.540 | 34771.534  | 0.006  |
| 4   | 1     | 4     | 4.5 | 4.0 | 3    | 0      | 3      | 3.5  | 3.0  | 34771.074 | 34771.069  | 0.005  |
| 4   | 1     | 4     | 4.5 | 5.0 | 3    | 0      | 3      | 3.5  | 4.0  | 34773.591 | 34773.596  | -0.005 |
| 4   | 1     | 4     | 4.5 | 6.0 | 3    | 0      | 3      | 3.5  | 5.0  | 34777.031 | 34777.031  | 0.000  |
| 5   | 0     | 5     | 4.5 | 3.0 | 4    | 0      | 4      | 3.5  | 2.0  | 26251.381 | 26251.373  | 0.008  |
| 5   | 0     | 5     | 4.5 | 4.0 | 4    | 0      | 4      | 3.5  | 3.0  | 26250.753 | 26250.750  | 0.003  |
| 5   | 0     | 5     | 4.5 | 5.0 | 4    | 0      | 4      | 3.5  | 4.0  | 26251.487 | 26251.489  | -0.002 |
| 5   | 0     | 5     | 4.5 | 6.0 | 4    | 0      | 4      | 3.5  | 5.0  | 26251.983 | 26251.982  | 0.001  |
| 5   | 0     | 5     | 5.5 | 5.0 | 4    | 0      | 4      | 4.5  | 4.0  | 26203.239 | 26203.243  | -0.004 |
| 5   | 0     | 5     | 5.5 | 6.0 | 4    | 0      | 4      | 4.5  | 5.0  | 26203.967 | 26203.968  | -0.001 |
| 5   | 0     | 5     | 5.5 | 7.0 | 4    | 0      | 4      | 4.5  | 6.0  | 26204.405 | 26204.406  | -0.001 |
| 5   | 1     | 5     | 5.5 | 4.0 | 4    | 1      | 4      | 4.5  | 3.0  | 25393.133 | 25393.135  | -0.002 |
| 5   | 1     | 5     | 5.5 | 5.0 | 4    | 1      | 4      | 4.5  | 4.0  | 25392.870 | 25392.871  | -0.001 |
| 5   | 1     | 5     | 5.5 | 6.0 | 4    | 1      | 4      | 4.5  | 5.0  | 25393.691 | 25393.691  | 0.000  |
| 5   | 1     | 5     | 5.5 | 7.0 | 4    | 1      | 4      | 4.5  | 6.0  | 25394.622 | 25394.622  | 0.000  |

| $N$ | $K_a$ | $K_c$ | $J$ | $F$ | $N'$ | $K_a'$ | $K_c'$ | $J'$ | $F'$ | Observed  | Calculated | O.-C.  |
|-----|-------|-------|-----|-----|------|--------|--------|------|------|-----------|------------|--------|
| 5   | 1     | 4     | 4.5 | 4.0 | 4    | 1      | 3      | 3.5  | 3.0  | 27298.343 | 27298.347  | -0.004 |
| 5   | 1     | 4     | 4.5 | 5.0 | 4    | 1      | 3      | 3.5  | 4.0  | 27298.296 | 27298.296  | 0.000  |
| 5   | 1     | 4     | 4.5 | 6.0 | 4    | 1      | 3      | 3.5  | 5.0  | 27298.449 | 27298.450  | -0.001 |
| 5   | 1     | 4     | 5.5 | 4.0 | 4    | 1      | 3      | 4.5  | 3.0  | 27268.995 | 27268.996  | -0.001 |
| 5   | 1     | 4     | 5.5 | 5.0 | 4    | 1      | 3      | 4.5  | 4.0  | 27268.486 | 27268.485  | 0.001  |
| 5   | 1     | 4     | 5.5 | 6.0 | 4    | 1      | 3      | 4.5  | 5.0  | 27268.723 | 27268.723  | 0.000  |
| 5   | 1     | 4     | 5.5 | 7.0 | 4    | 1      | 3      | 4.5  | 6.0  | 27269.484 | 27269.483  | 0.001  |
| 4   | 2     | 4     | 4.5 | 4.0 | 3    | 2      | 3      | 3.5  | 3.0  | 21255.194 | 21255.193  | 0.001  |
| 4   | 2     | 4     | 4.5 | 5.0 | 3    | 2      | 3      | 3.5  | 4.0  | 21254.698 | 21254.698  | 0.000  |
| 4   | 2     | 4     | 4.5 | 6.0 | 3    | 2      | 3      | 3.5  | 5.0  | 21259.686 | 21259.686  | 0.000  |
| 4   | 2     | 3     | 4.5 | 4.0 | 3    | 2      | 2      | 3.5  | 3.0  | 21188.904 | 21188.906  | -0.002 |
| 4   | 2     | 3     | 4.5 | 5.0 | 3    | 2      | 2      | 3.5  | 4.0  | 21188.502 | 21188.500  | 0.002  |
| 4   | 2     | 3     | 4.5 | 6.0 | 3    | 2      | 2      | 3.5  | 5.0  | 21193.773 | 21193.773  | 0.000  |
| 6   | 0     | 6     | 5.5 | 5.0 | 5    | 0      | 5      | 4.5  | 4.0  | 31419.064 | 31419.063  | 0.001  |
| 6   | 0     | 6     | 5.5 | 6.0 | 5    | 0      | 5      | 4.5  | 5.0  | 31419.438 | 31419.436  | 0.002  |
| 6   | 0     | 6     | 5.5 | 7.0 | 5    | 0      | 5      | 4.5  | 6.0  | 31419.743 | 31419.743  | 0.000  |
| 6   | 0     | 6     | 6.5 | 5.0 | 5    | 0      | 5      | 5.5  | 4.0  | 31376.264 | 31376.263  | 0.001  |
| 6   | 0     | 6     | 6.5 | 6.0 | 5    | 0      | 5      | 5.5  | 5.0  | 31376.264 | 31376.262  | 0.002  |
| 6   | 0     | 6     | 6.5 | 7.0 | 5    | 0      | 5      | 5.5  | 6.0  | 31376.847 | 31376.847  | 0.000  |
| 6   | 0     | 6     | 6.5 | 8.0 | 5    | 0      | 5      | 5.5  | 7.0  | 31377.318 | 31377.317  | 0.001  |
